# Supplementary material for: Organocatalytic C–H fluoroalkylation of commodity polymers
Source: Royal Society of Chemistry journal article supplement (doi:10.1039/c9py01884k), 2020-01-01
Supplement: c9py01884k1.pdf [file c9py01884k1.pdf]

## Supporting Information

### An organocatalytic perfluoroalkylation of commodity polymers

Sally E. Lewis,<sup>1</sup> Bradley Wilhelmy Jr,<sup>1</sup> Frank A. Leibfarth<sup>1</sup>

<sup>1</sup>Department of Chemistry, University of North Carolina at Chapel Hill, 125 South Rd, Chapel Hill, NC 27599 (USA)

Correspondence to: Frank A. Leibfarth (E-mail: [Frankl@unc.edu](mailto:Frankl@unc.edu))

### Table of Contents

|                                                                   |    |
|-------------------------------------------------------------------|----|
| Materials and Methods.....                                        | 2  |
| GPC trace of starting material .....                              | 3  |
| GPC traces of catalyst screening reactions .....                  | 4  |
| Table S1 Optimization of trifluoromethylation of polystyrene..... | 9  |
| GPC traces of increased reagent loading studies .....             | 10 |
| GPC traces of anhydride scope .....                               | 11 |
| GPC traces of commodity polymer functionalization reactions ..... | 12 |
| <sup>1</sup> H NMR study of the Br chain-end.....                 | 14 |
| <sup>19</sup> F NMR spectra of functionalized products .....      | 15 |
| References .....                                                  | 22 |

## Materials and Methods

### General Considerations

NMR spectra were recorded using a Bruker DRX 400 MHz spectrometer. Chemical shifts  $\delta$  (ppm) are referenced using the unified scale relative to the absolute frequency for  $^1\text{H}$  of 0.1% TMS in  $\text{CDCl}_3$  ( $^{19}\text{F}$ ). Gel permeation chromatography (GPC) was performed on either a Tosoh EcoSEC Elite GPC system equipped with a TSKgel Super HM-M (17392) column maintained at 40 °C with an RI detector or a Waters 2695 separations module liquid chromatograph equipped with either four Waters Styragel HR columns (WAT044225, WAT044231, WAT044237, and WAT054460) arranged in series or two Agilent Resipore columns (PL1113-6300) maintained at 35 °C, and a Waters 2414 refractive index detector at room temperature. Tetrahydrofuran was used as the mobile phase at a flow rate of 0.5 mL/min (Tosoh GPC) or 1.0 mL/min (Waters GPC). Molecular weight and dispersity data are reported relative to polystyrene standards.

### Material Synthesis

All starting materials were used as purchased without further purification. Polystyrene (**1**) and catalysts **2-11** were synthesized according to literature procedure.<sup>1-6</sup>

### GPC trace of starting material

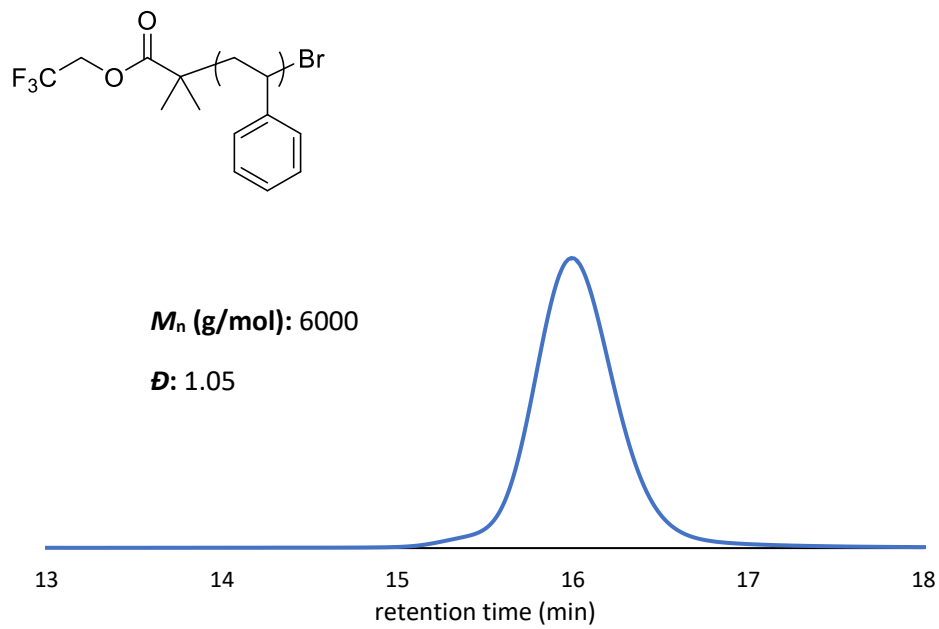

**Figure S1:** GPC trace of polystyrene (1) starting material for catalyst screening and optimization studies.

## GPC traces of catalyst screening reactions

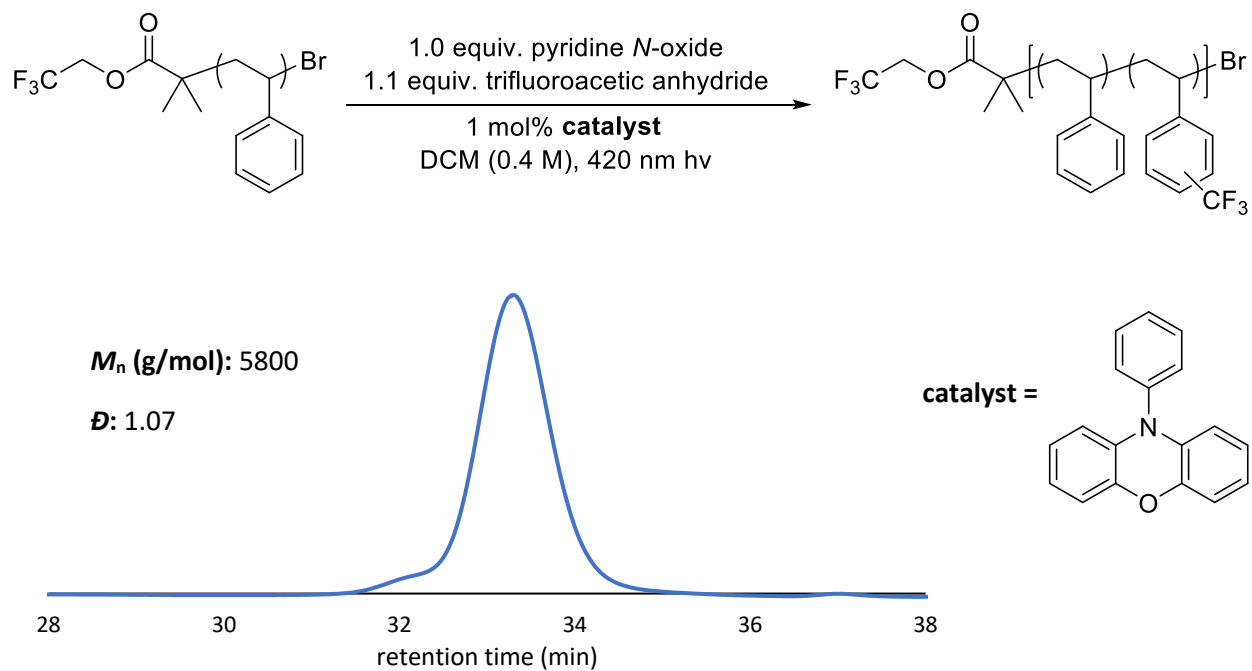

Figure S2: GPC trace of trifluoromethylated polystyrene using **2** as the organic catalyst.

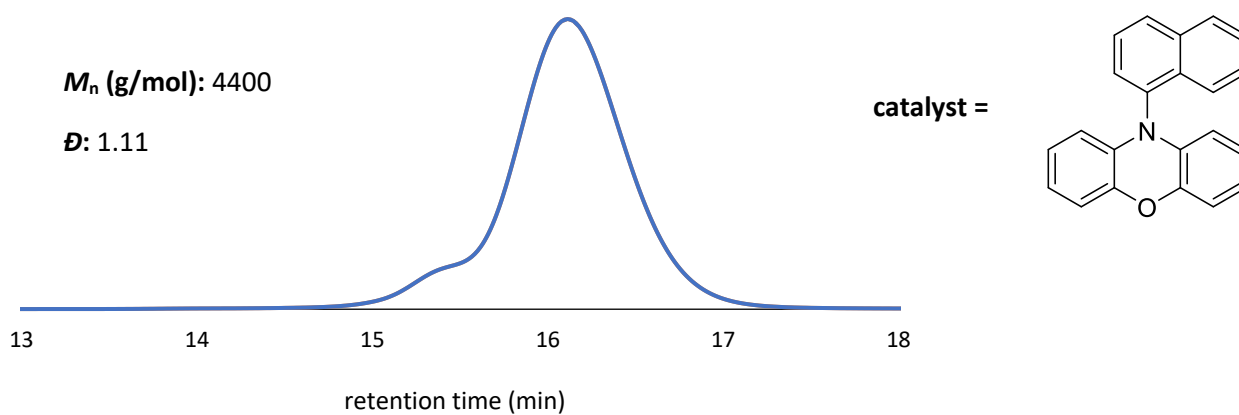

Figure S3: GPC trace of trifluoromethylated polystyrene using **3** as the organic catalyst.

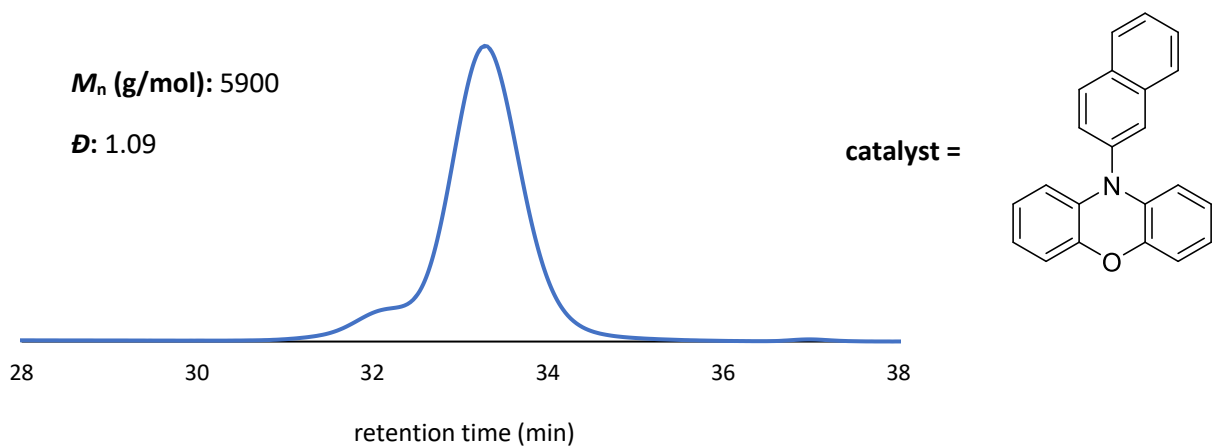

**Figure S4:** GPC trace of trifluoromethylated polystyrene using **4** as the organic catalyst.

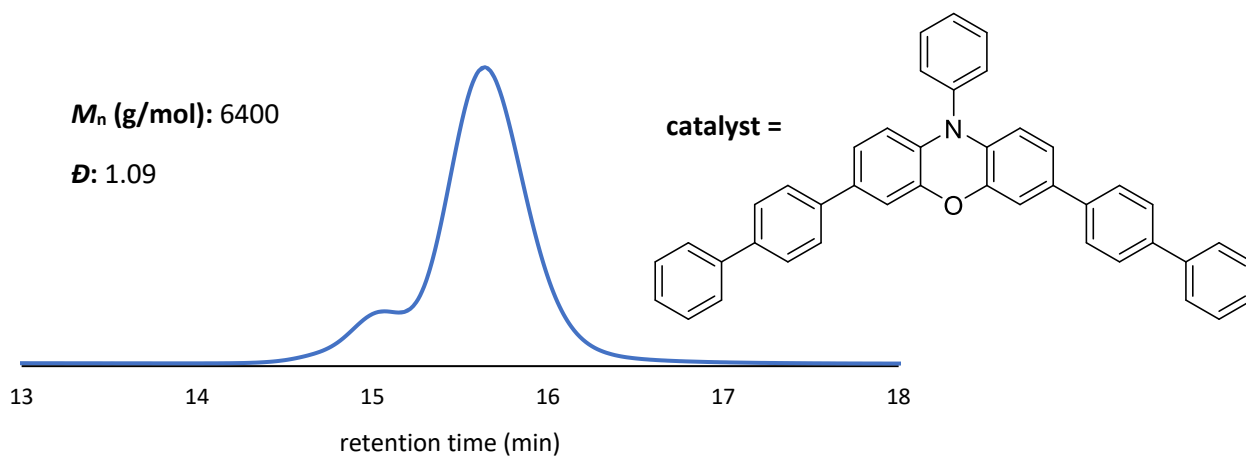

**Figure S5:** GPC trace of trifluoromethylated polystyrene using **5** as the organic catalyst.

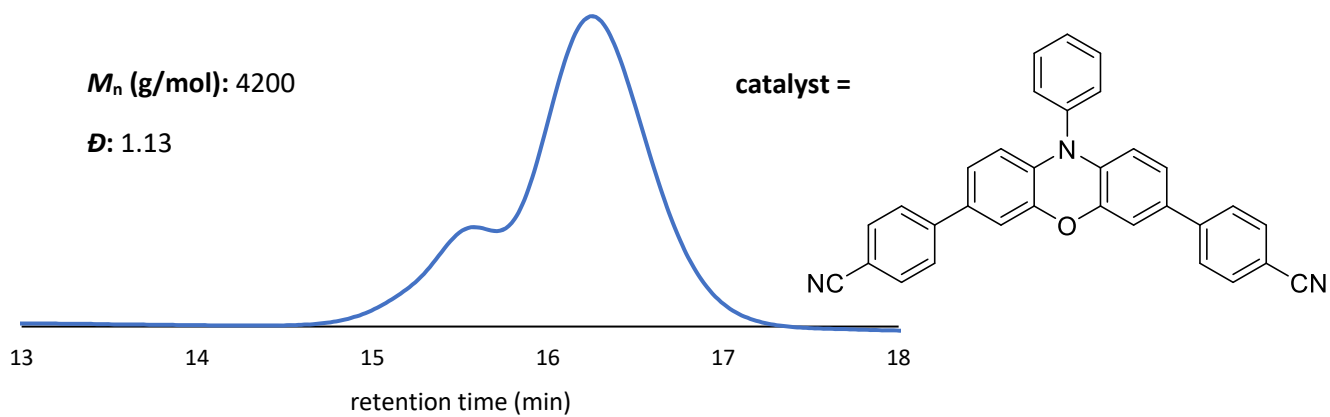

**Figure S6:** GPC trace of trifluoromethylated polystyrene using **6** as the organic catalyst.

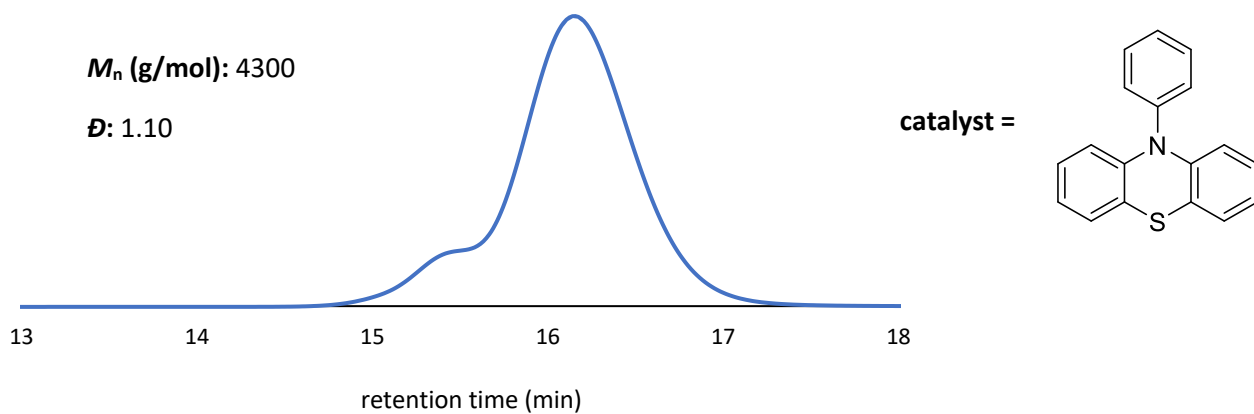

**Figure S7:** GPC trace of trifluoromethylated polystyrene using **7** as the organic catalyst.

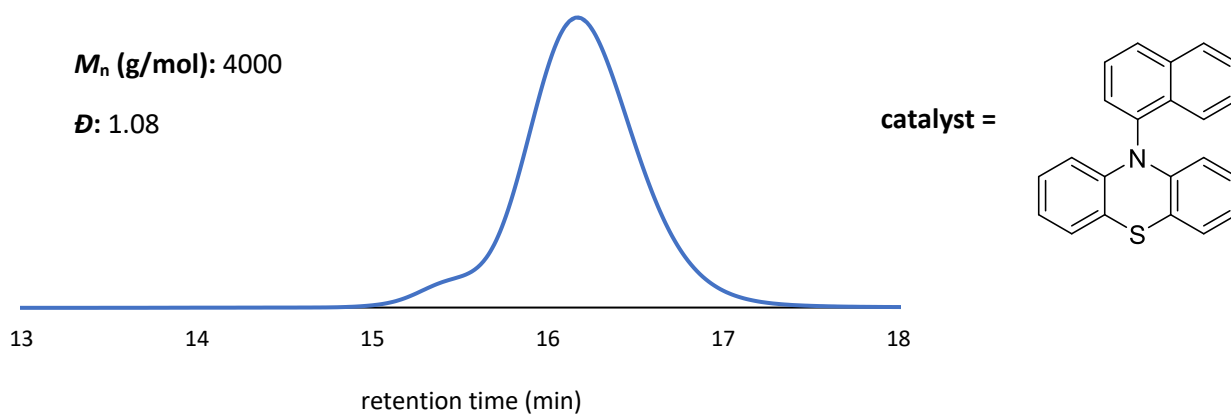

**Figure S8:** GPC trace of trifluoromethylated polystyrene using **8** as the organic catalyst.

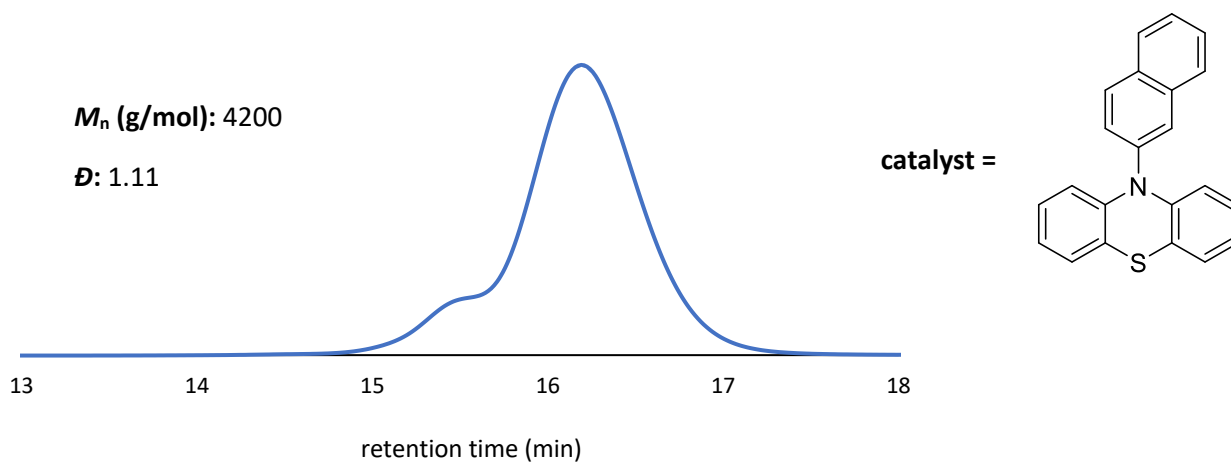

**Figure S9:** GPC trace of trifluoromethylated polystyrene using **9** as the organic catalyst.

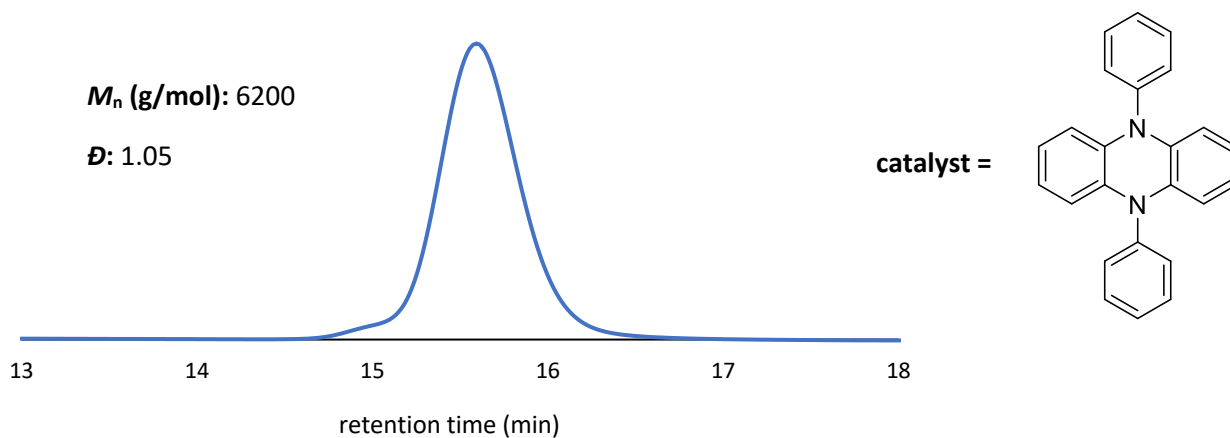

**Figure S10:** GPC trace of trifluoromethylated polystyrene using **10** as the organic catalyst.

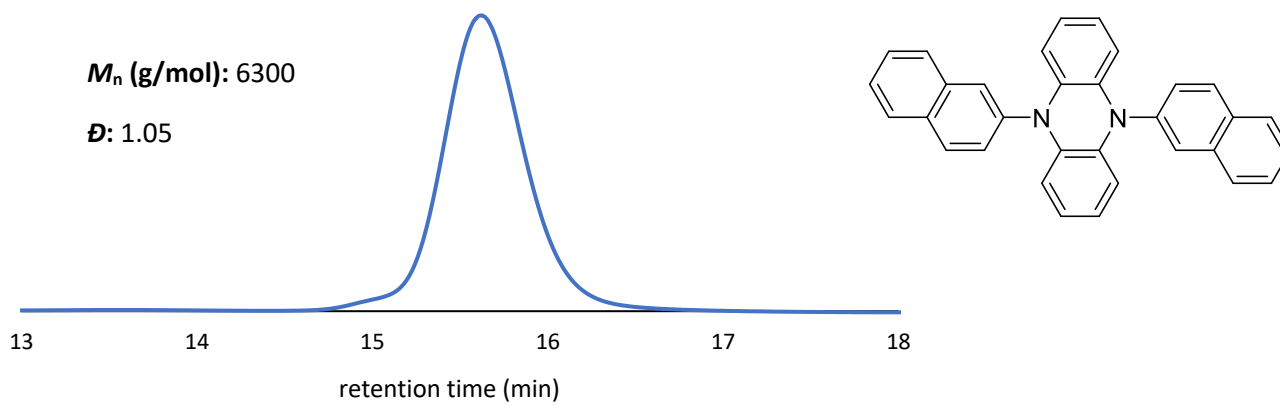

**Figure S11:** GPC trace of trifluoromethylated polystyrene using **11** as the organic catalyst.



**Table S1 Optimization of trifluoromethylation of polystyrene**

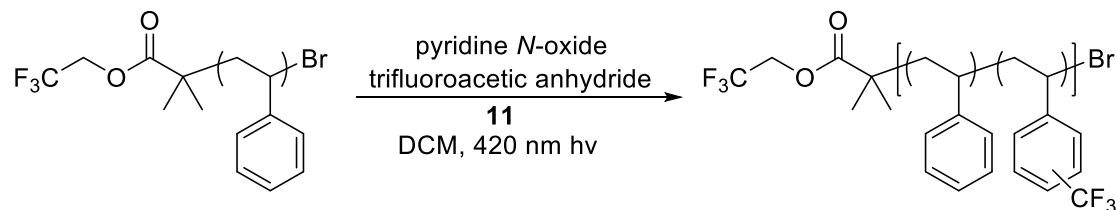

| Table entry | equiv pyridine <i>N</i> -oxide | equiv TFAA | [repeat unit] (M) | Mol% <b>11</b> | Reaction Time (hr) | Average CF <sub>3</sub> per 100 repeat units |
|-------------|--------------------------------|------------|-------------------|----------------|--------------------|----------------------------------------------|
| <b>1</b>    | 1.0                            | 1.1        | 0.4               | 1              | 16                 | 18                                           |
| <b>2</b>    | 1.0                            | 1.1        | 0.4               | 0.1            | 16                 | 12                                           |
| <b>3</b>    | 1.0                            | 1.1        | 0.4               | 0.5            | 16                 | 18                                           |
| <b>4</b>    | 1.0                            | 1.1        | 0.4               | 2              | 16                 | 20                                           |
| <b>5</b>    | 1.0                            | 1.1        | 0.4               | 5              | 16                 | 16                                           |
| <b>6</b>    | 1.0                            | 1.1        | 0.4               | 1              | 16                 | 16                                           |
| <b>7</b>    | 1.0                            | 1.1        | 0.4               | 2              | 16                 | 16                                           |
| <b>8</b>    | 1.0                            | 1.1        | 0.8               | 1              | 16                 | 20                                           |
| <b>9</b>    | 1.0                            | 1.1        | 0.2               | 1              | 16                 | 12                                           |
| <b>10</b>   | 1.0                            | 1.1        | 0.1               | 1              | 16                 | 11                                           |
| <b>11</b>   | 1.0                            | 1.1        | 1.2               | 1              | 16                 | 25                                           |
| <b>12</b>   | 1.0                            | 1.1        | 1.6               | 1              | 16                 | 8.4                                          |
| <b>13</b>   | 5.0                            | 5.5        | 0.8               | 1              | 16                 | 8.3                                          |
| <b>14</b>   | 5.0                            | 5.5        | 1.2               | 1              | 16                 | 3.3                                          |
| <b>15</b>   | 2.0                            | 2.2        | 0.4               | 1              | 16                 | 27                                           |
| <b>16</b>   | 2.0                            | 2.2        | 0.8               | 1              | 16                 | 28                                           |
| <b>17</b>   | 1.0                            | 1.1        | 0.4               | 1              | 1                  | 1.9                                          |
| <b>18</b>   | 1.0                            | 1.1        | 0.4               | 1              | 3                  | 5.9                                          |
| <b>19</b>   | 1.0                            | 1.1        | 0.4               | 1              | 5                  | 7.6                                          |
| <b>20</b>   | 1.0                            | 1.1        | 0.4               | 1              | 7                  | 10                                           |
| <b>21</b>   | 3.0                            | 3.3        | 0.4               | 1              | 16                 | 31                                           |
| <b>22</b>   | 5.0                            | 5.5        | 0.4               | 1              | 16                 | 33                                           |
| <b>23</b>   | 7.0                            | 7.7        | 0.4               | 1              | 16                 | 27                                           |

### GPC traces of increased reagent loading studies

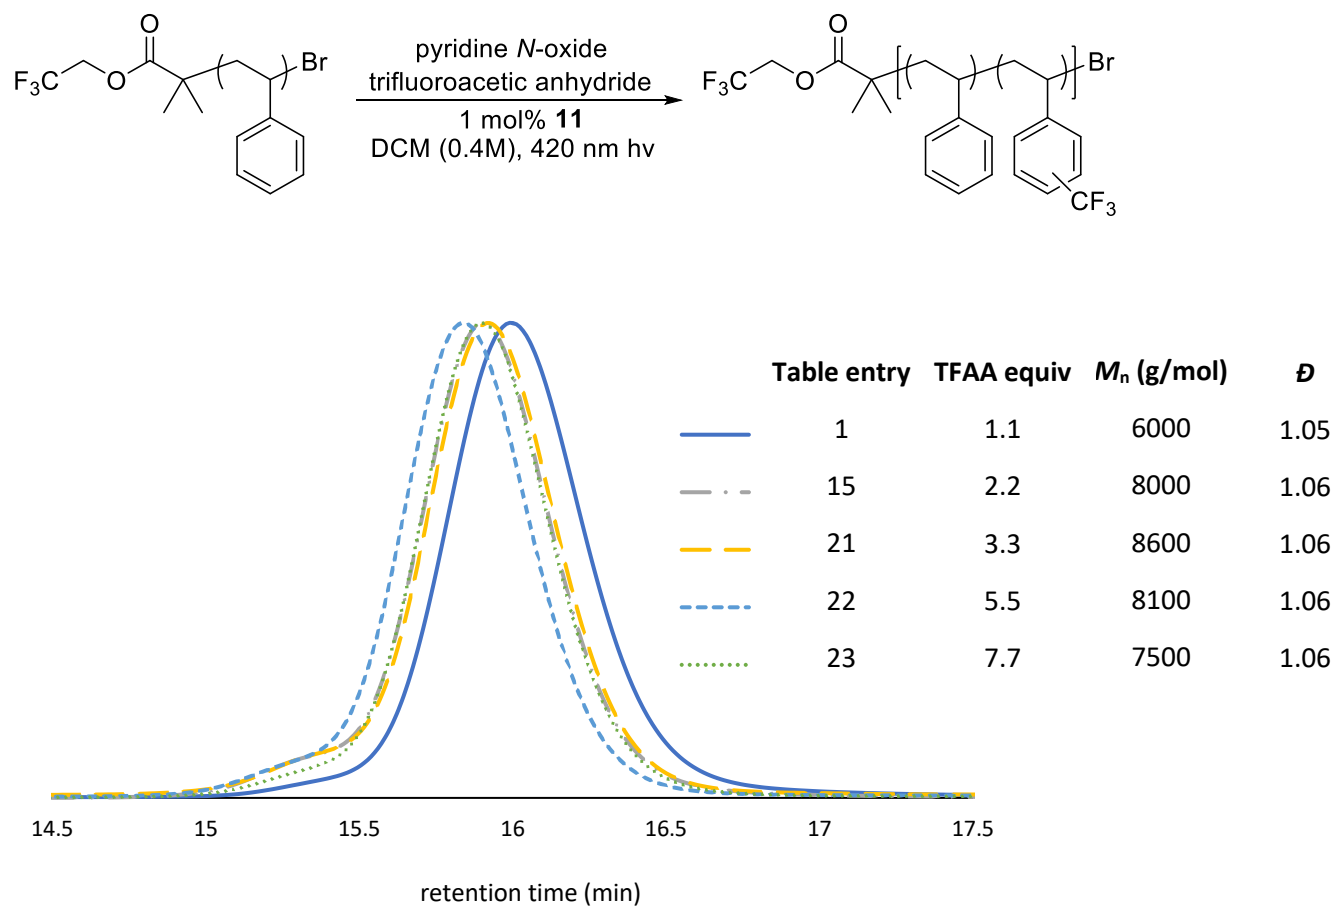

**Figure S12:** GPC overlay of increasing TFAA/pyridine *N*-oxide equivalents in the trifluoromethylation of polystyrene, reference **table S1** for reaction conditions. The starting  $M_n$  and  $\mathcal{D}$  for these reactions was 6000 g/mol and 1.05, respectively

### GPC traces of anhydride scope

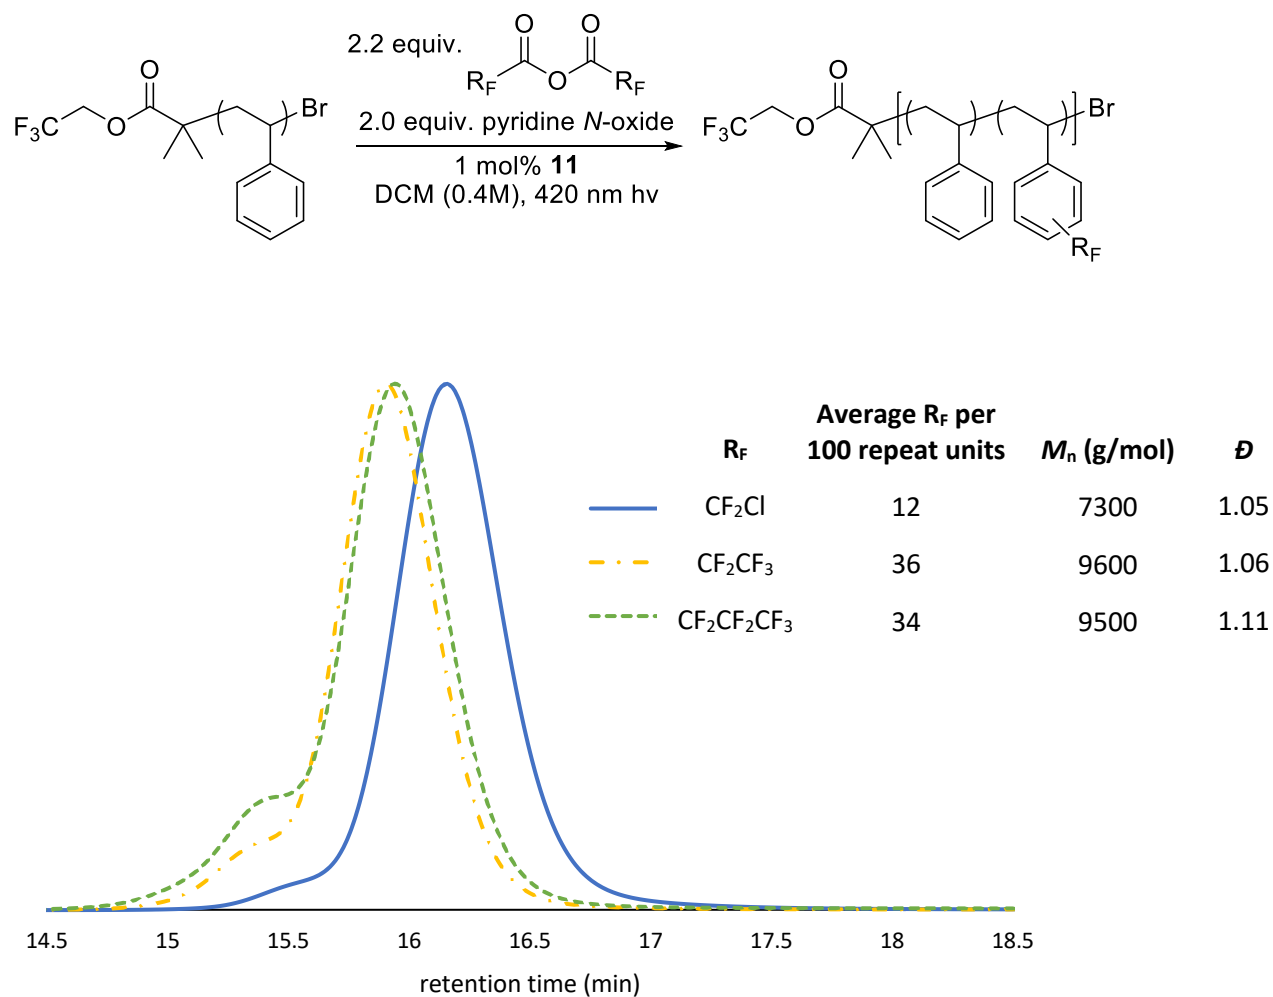

**Figure S13:** GPC overlay of anhydride scope. The starting  $M_n$  and  $\mathcal{D}$  for these reactions was 6000 g/mol and 1.05, respectively

## GPC traces of commodity polymer functionalization reactions

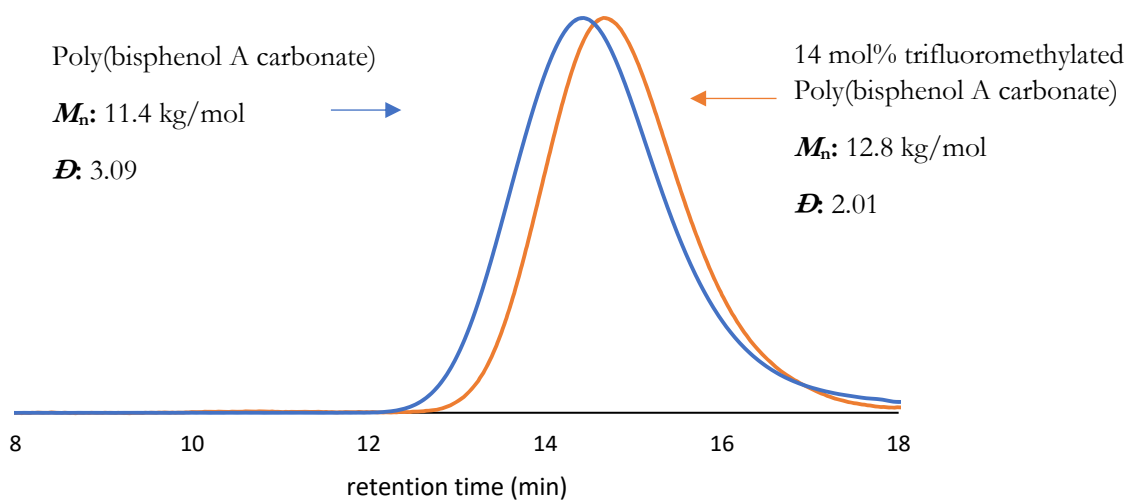

**Figure S14:** GPC overlay of poly(bisphenol A carbonate) and functionalized poly(bisphenol A carbonate). The shift in retention time is attributed to a decrease in the hydrodynamic radius of the polymer upon trifluoromethylation.

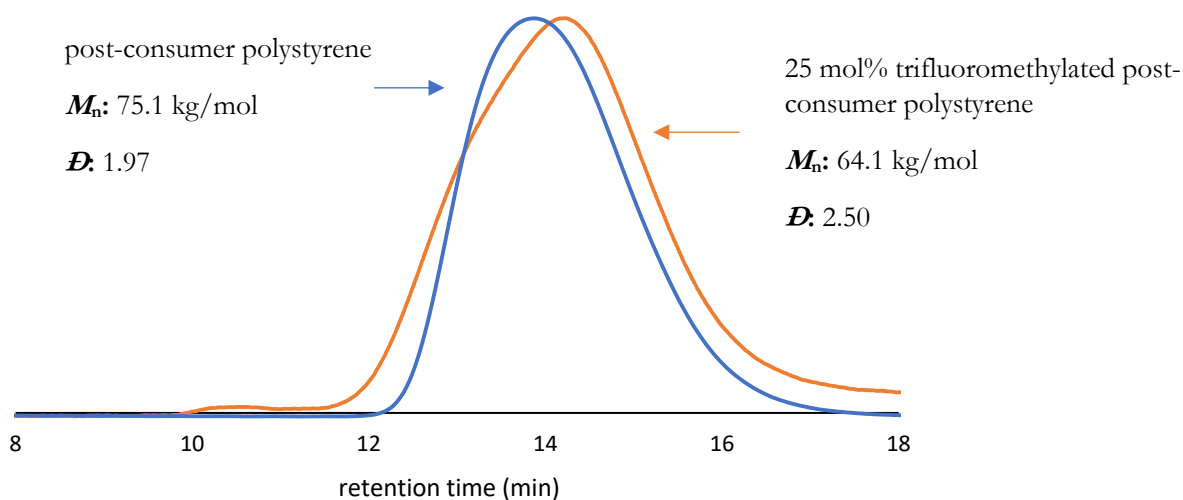

**Figure S15:** GPC overlay of post-consumer polystyrene and functionalized post-consumer polystyrene. The shift in retention time is attributed to a decrease in the hydrodynamic radius of the polymer upon trifluoromethylation.

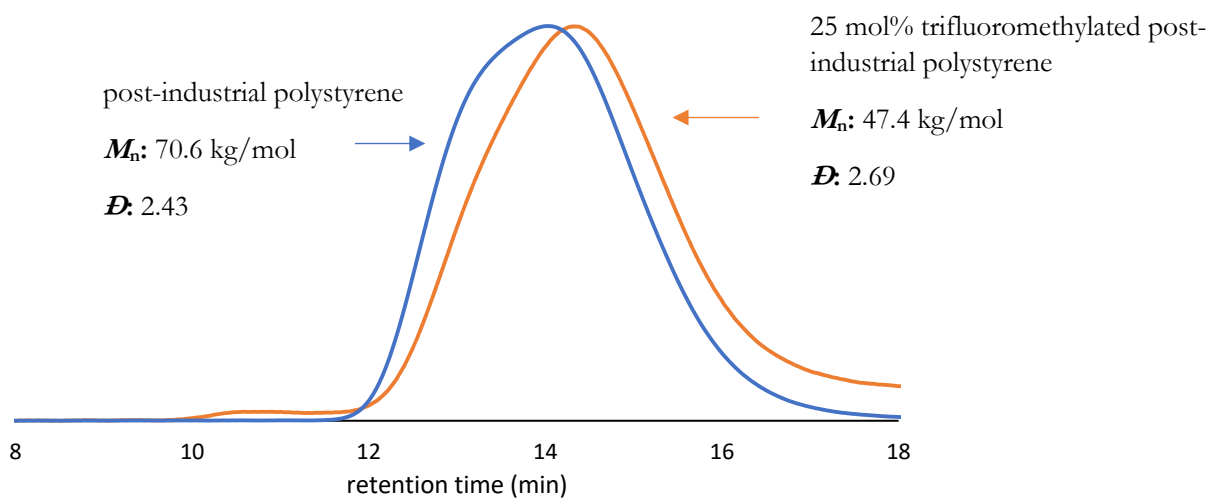

**Figure S16:** GPC overlay of post-industrial polystyrene and functionalized post-industrial polystyrene. The shift in retention time is attributed to a decrease in the hydrodynamic radius of the polymer upon trifluoromethylation.

## $^1\text{H}$ NMR study of the Br chain-end

The chemoselectivity of the fluoroalkylation in terms of retention of the bromine end-group was studied experimentally. Figure S17 demonstrates that the hydrogen alpha to the bromine chain-end is clearly seen in the  $^1\text{H}$  NMR before and after functionalization indicating that the bromine is retained. By integrating the  $\text{H}^{\text{a}}$  and  $\text{H}^{\text{a}'}$  protons to 1.00, a degree of polymerization (DP) was determined for both polymer samples using the signals produced from  $\text{H}^{\text{c}} + \text{H}^{\text{d}}$  and  $\text{H}^{\text{c}'} + \text{H}^{\text{d}'}$ . Additionally, accounting for the weight of the chain-ends, the DP from the GPC data was also calculated, shown in part D. In both cases, the NMR DP values are similar to the GPC values. The combination of this experimental data indicates that the bromine chain-end is retained during the functionalization reaction on the majority of the polymer chains.

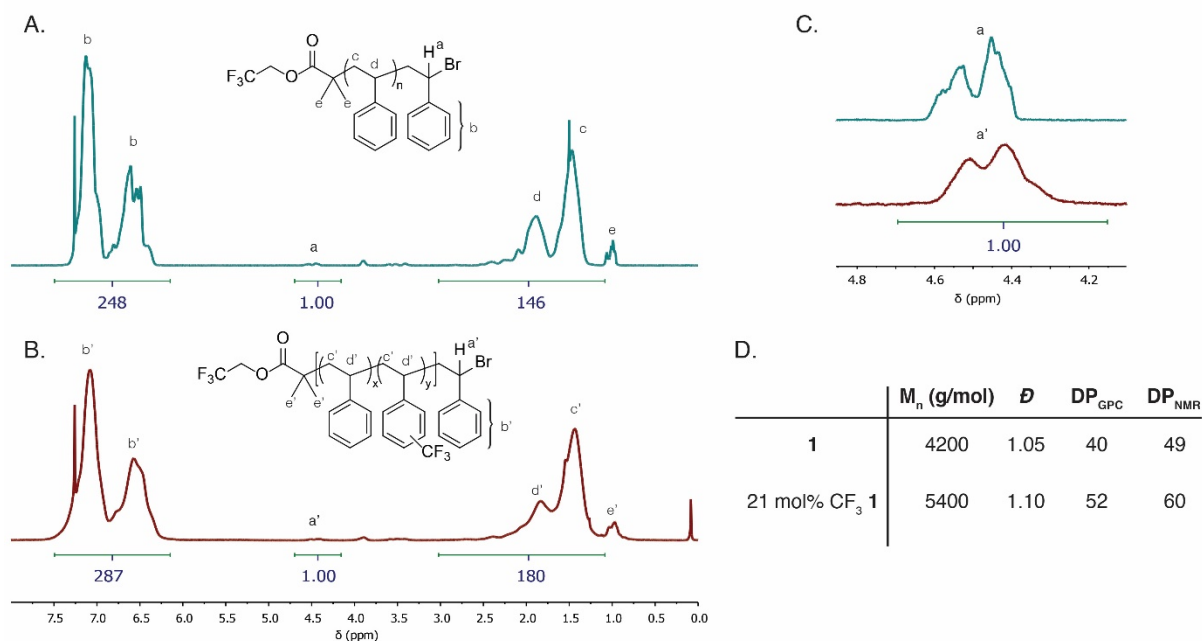

**Figure S17:** (A)  $^1\text{H}$  NMR spectra of an unfunctionalized PS **1** containing a bromine on the omega chain-end. (B)  $^1\text{H}$  NMR spectra of a 21 mol% trifluoromethylated PS sample. (C) expansion of the  $^1\text{H}$  NMR spectra of the region containing the proton alpha to the bromine ( $\text{H}^{\text{a}}$  and  $\text{H}^{\text{a}'}$ ). (D) a table containing the  $M_n$ ,  $D$ , and degree of polymerization (DP) values calculated from NMR and GPC data.

### <sup>19</sup>F NMR spectra of functionalized products

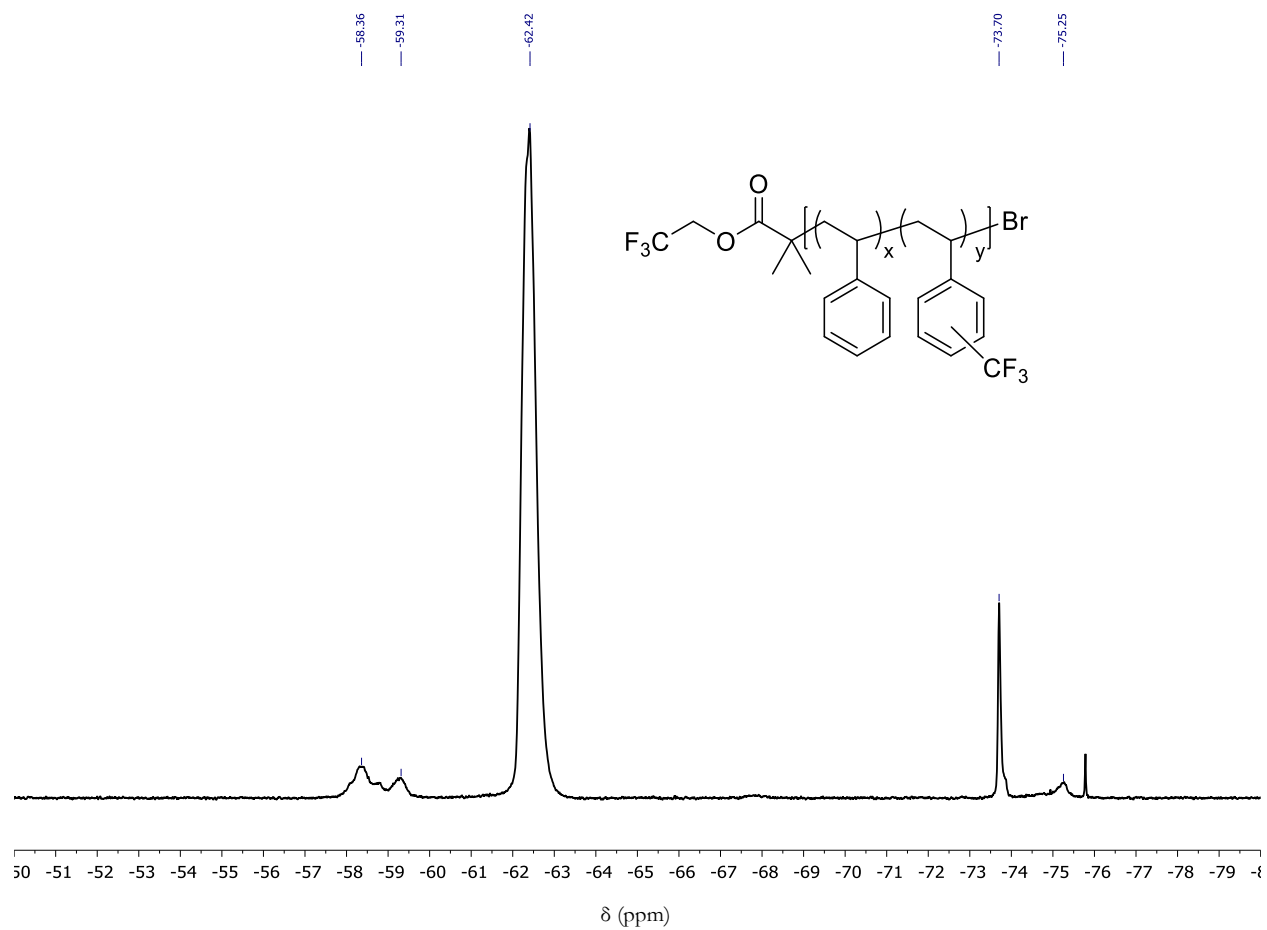

**Figure S18:** <sup>19</sup>F NMR (CDCl<sub>3</sub>) of trifluoromethylated polystyrene.  $\delta$  -58.36, -59.31, -62.42, -73.70, -75.25 ppm

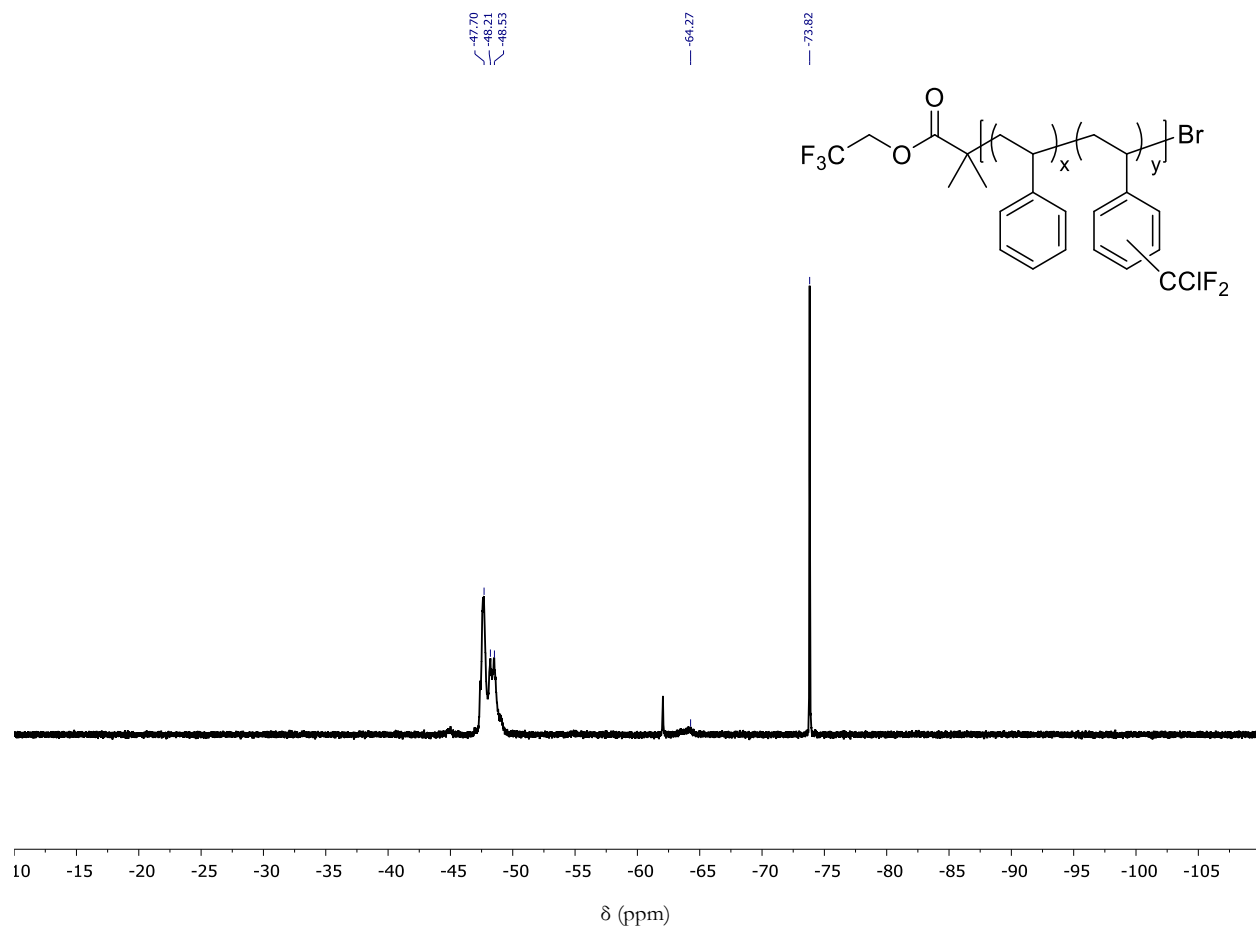

**Figure S19:**  $^{19}\text{F}$  NMR ( $\text{CDCl}_3$ ) of chlorodifluoromethylated polystyrene.  $\delta$  -47.70, -48.21, -48.53, -64.27, -73.82 ppm



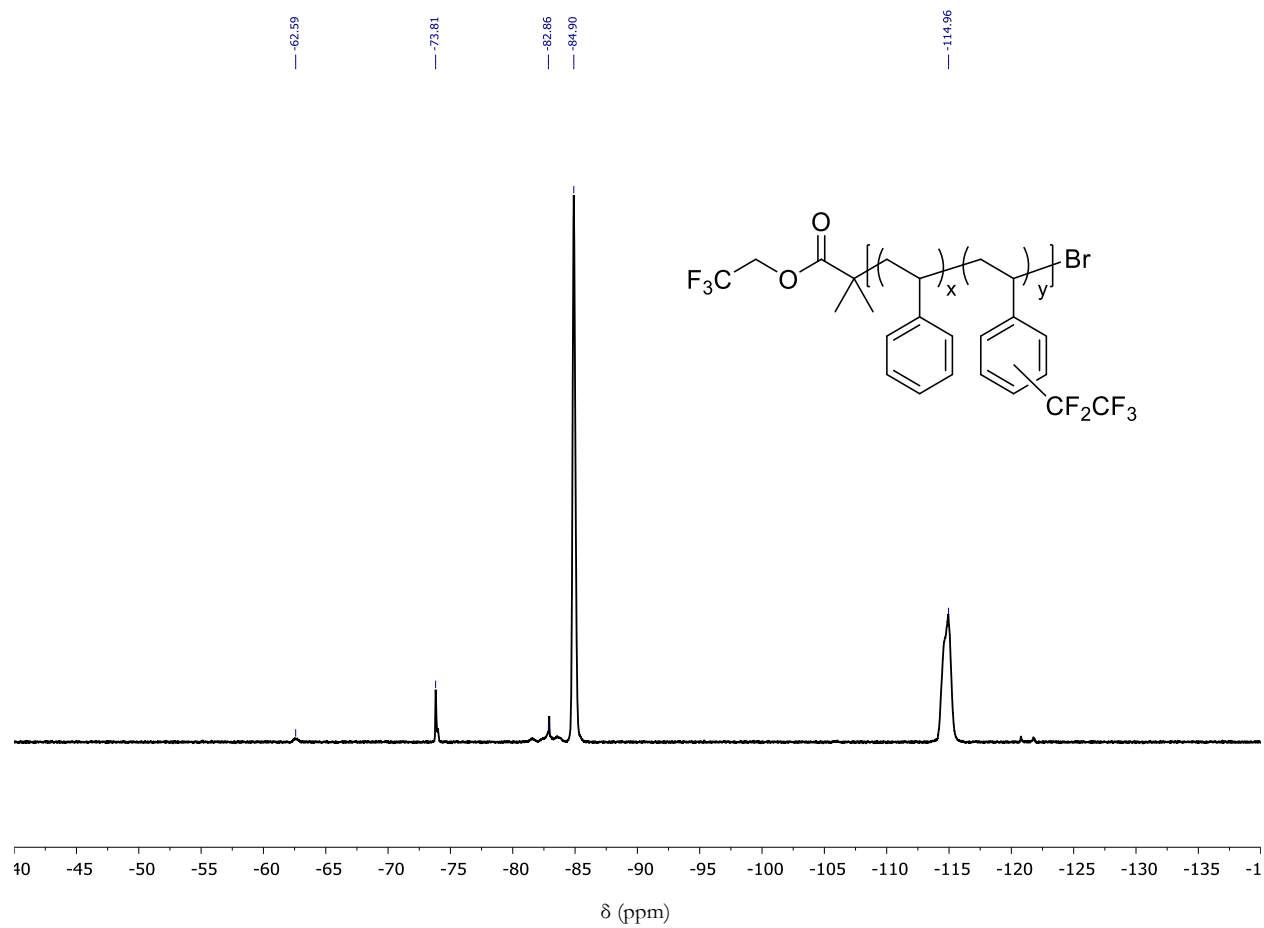

**Figure S20:**  $^{19}\text{F}$  NMR ( $\text{CDCl}_3$ ) of perfluoroethylated polystyrene.  $\delta$  -62.59, -73.81, -82.86, -84.90, -114.96 ppm

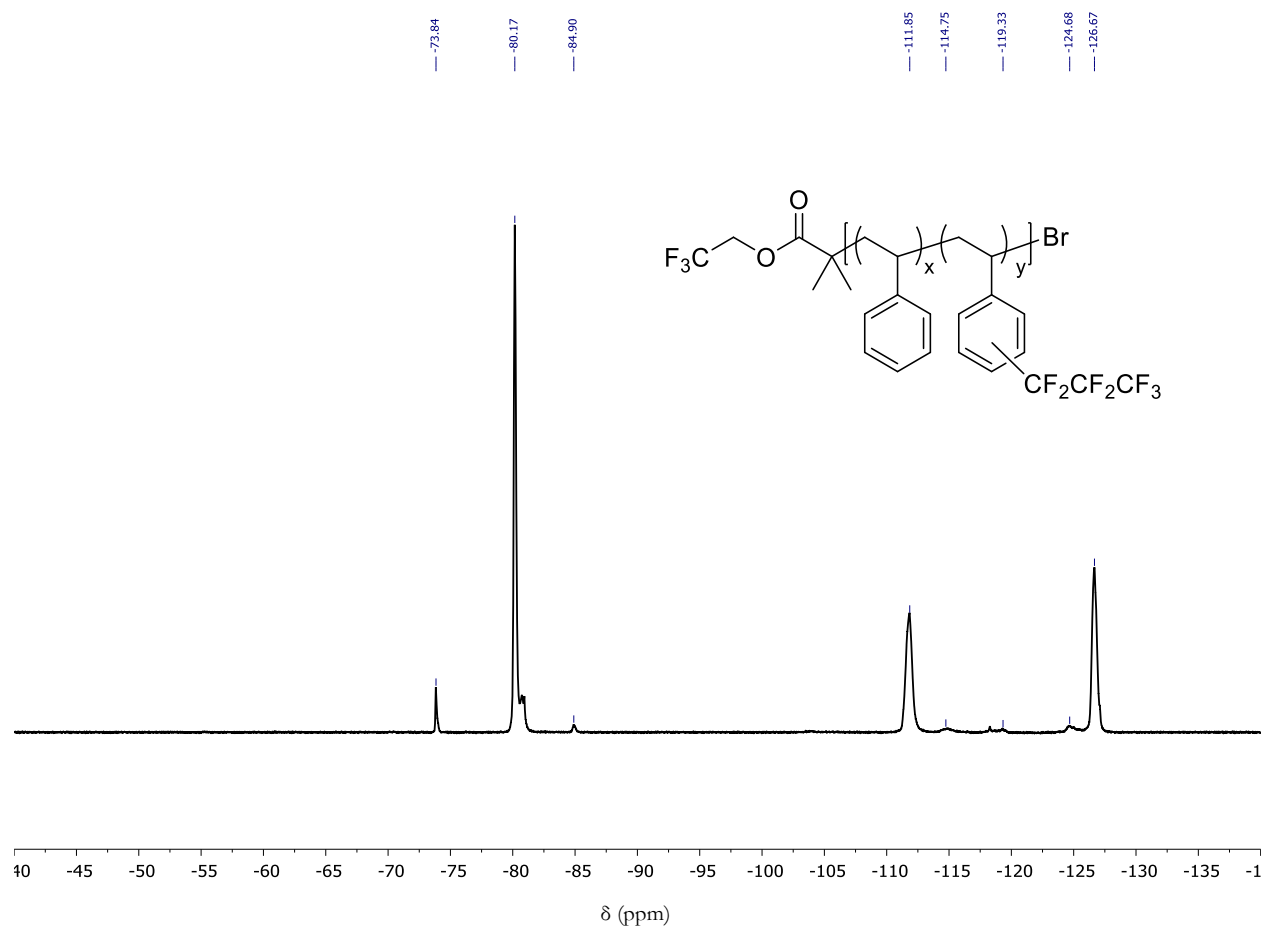

**Figure S21:**  $^{19}\text{F}$  NMR ( $\text{CDCl}_3$ ) of perfluoropropylated polystyrene.  $\delta$  -73.84, -80.17, -84.90, -111.85, -114.75, -119.33, -124.68, -126.67 ppm

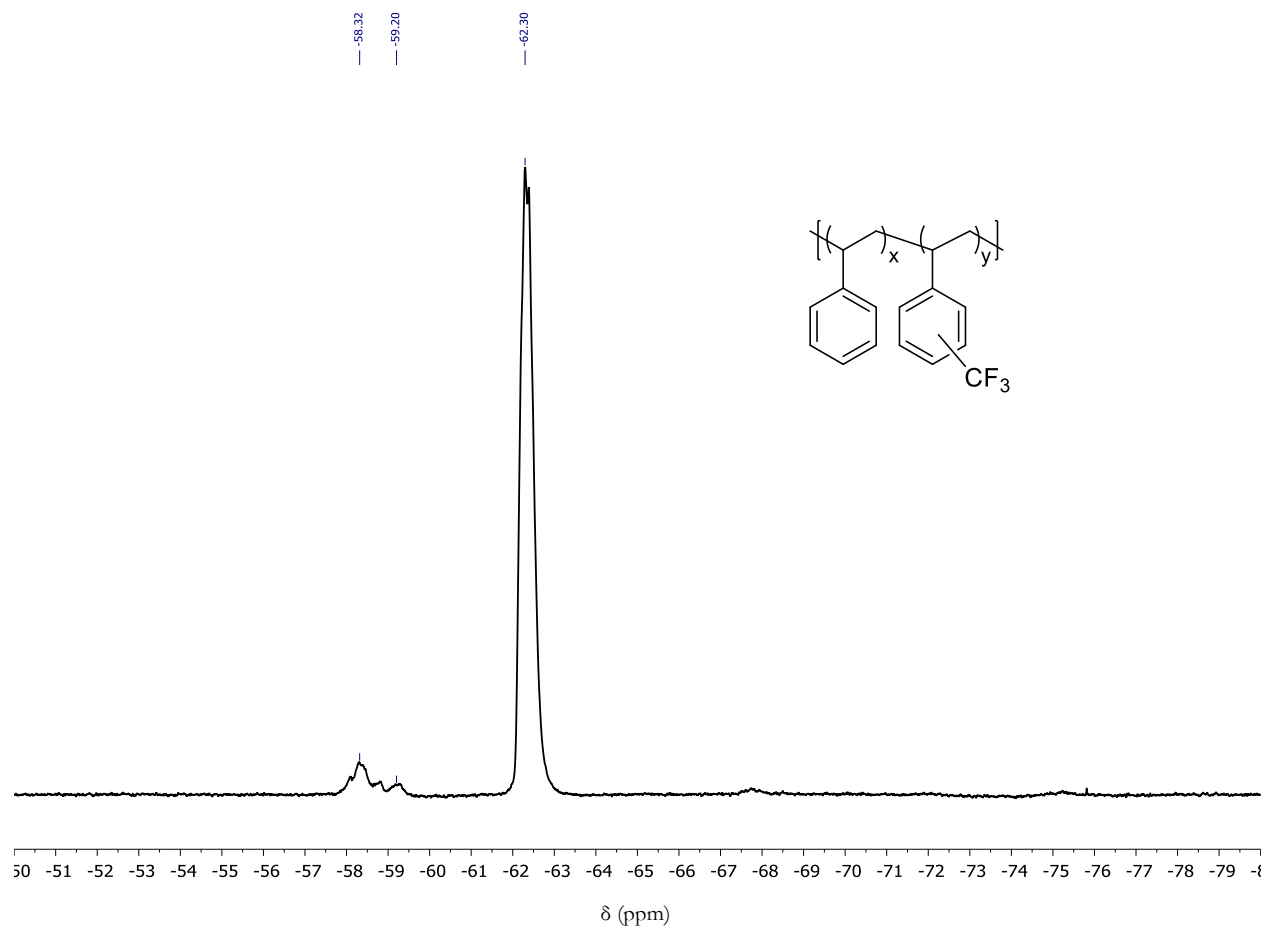

**Figure S22:**  $^{19}\text{F}$  NMR ( $\text{CDCl}_3$ ) of trifluoromethylated post-industrial waste polystyrene.  $\delta$  -58.32, -59.20, -62.30 ppm. Fluorobenzene (-113.15 ppm) was used as a standard for functionalization calculations.

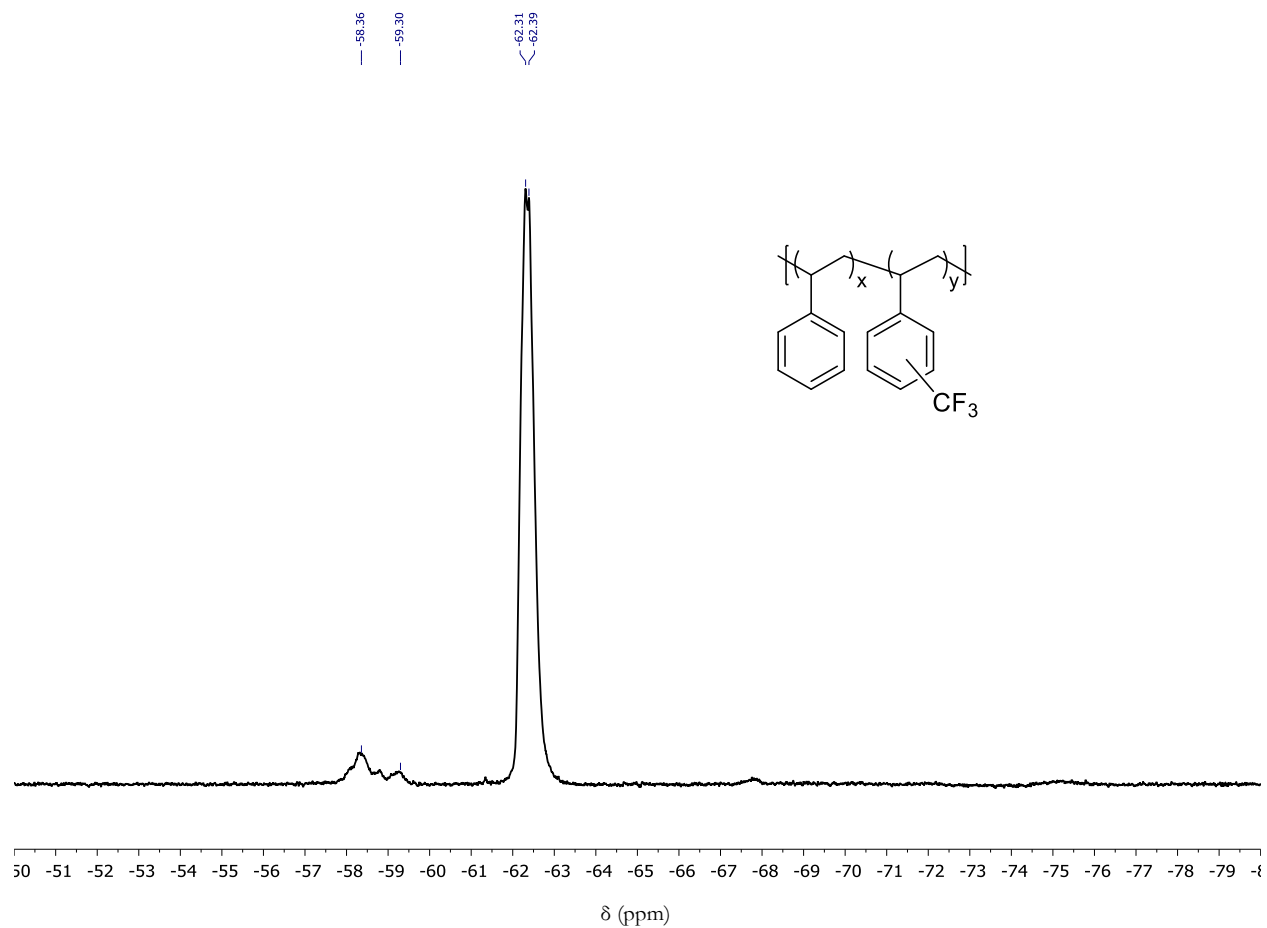

**Figure S23:**  $^{19}\text{F}$  NMR ( $\text{CDCl}_3$ ) of trifluoromethylated post-consumer waste polystyrene.  $\delta$  -58.36, -59.30, -62.31, -62.39 ppm. Fluorobenzene (-113.15 ppm) was used as a standard for functionalization calculations.

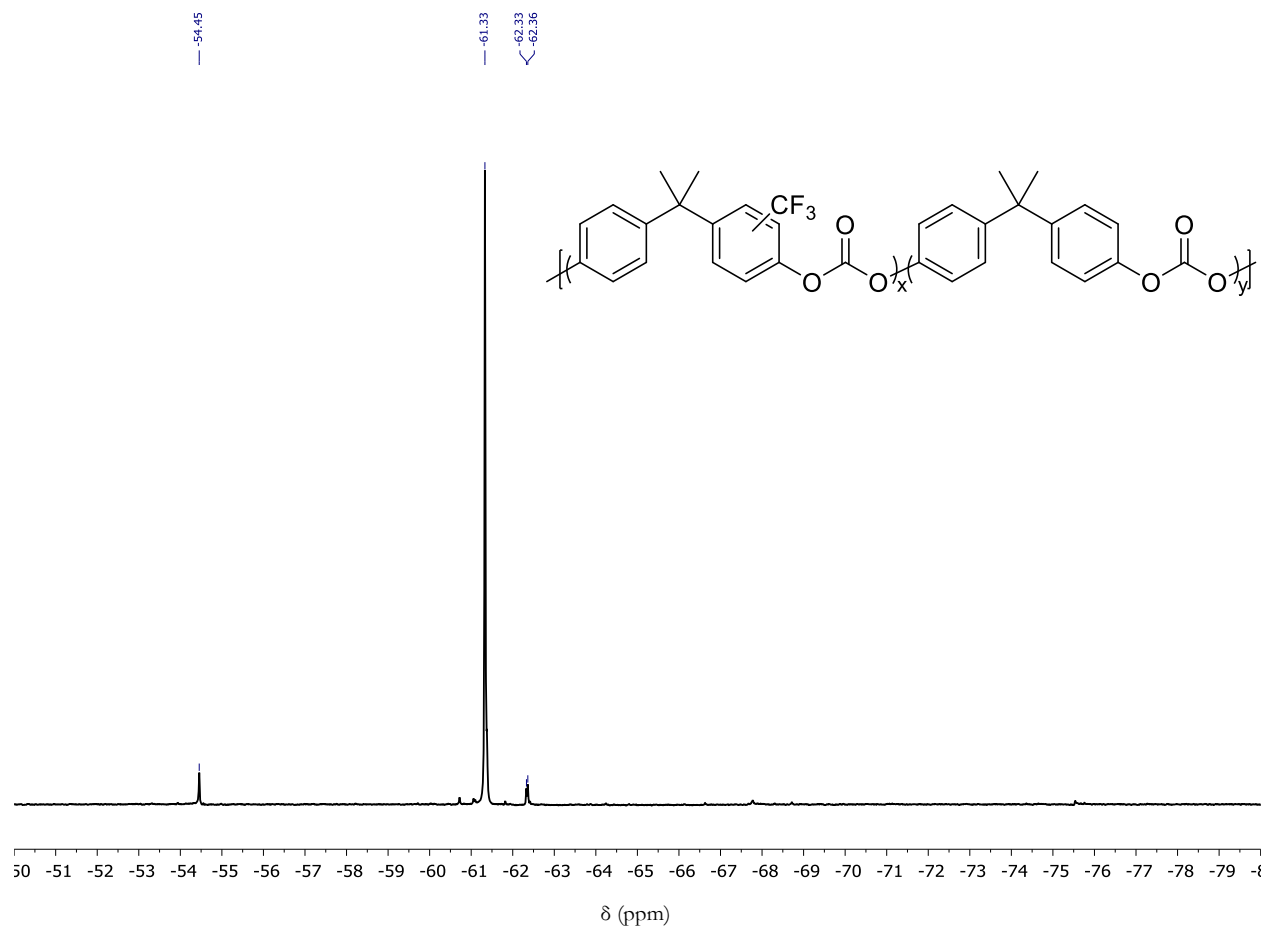

**Figure S24:**  $^{19}\text{F}$  NMR ( $\text{CDCl}_3$ ) of trifluoromethylated poly(bisphenol A carbonate).  $\delta$  -54.45, -61.33, -62.33, -62.36 ppm. Fluorobenzene (-113.15 ppm) was used as a standard for functionalization calculations.

## References

- 1 S. E. Lewis, B. E. Wilhelmy and F. A. Leibfarth, *Chem. Sci.*, 2019, **10**, 6270–6277.
- 2 N. J. Treat, H. Sprafke, J. W. Kramer, P. G. Clark, B. E. Barton, J. Read de Alaniz, B. P. Fors and C. J. Hawker, *J. Am. Chem. Soc.*, 2014, **136**, 16096–16101.
- 3 X. Pan, M. Lamson, J. Yan and K. Matyjaszewski, *ACS Macro Lett.*, 2015, **4**, 192–196.
- 4 Y. Zhao, H. Gong, K. Jiang, S. Yan, J. Lin and M. Chen, *Macromolecules*, 2018, **51**, 938–946.
- 5 J. C. Theriot, C.-H. Lim, H. Yang, M. D. Ryan, C. B. Musgrave and G. M. Miyake, *Science*, 2016, **352**, 1082–6.
- 6 B. G. McCarthy, R. M. Pearson, C.-H. Lim, S. M. Sartor, N. H. Damrauer and G. M. Miyake, *J. Am. Chem. Soc.*, 2018, **140**, 5088–5101.
